# Supplementary material for: PAC1 constrains type 2 inflammation through promotion of CGRP signaling in ILC2s
Source: J Clin Invest. 2024 Sep 17;134(21):e180109. doi: 10.1172/JCI180109 (PMC11527444; doi:10.1172/JCI180109)
Supplement: Supplemental data [file jci-134-180109-s214.pdf]

Supplemental Figure 1

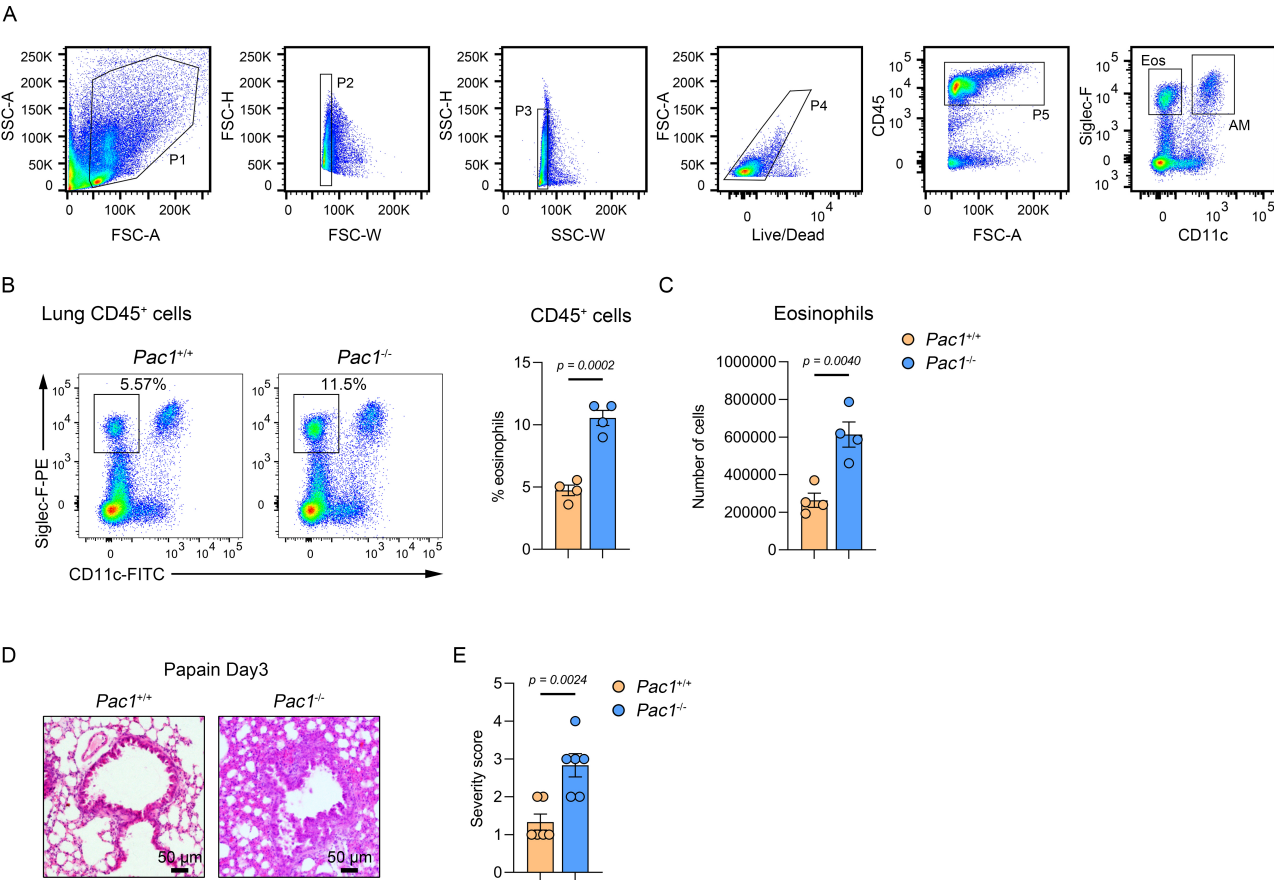

1 **Supplemental Figure 1. PAC1 constrains papain-induced allergic airway inflammation in mice**  
2 **(A)** Flow cytometry plots showing the gating strategies to identify eosinophils in murine BALF or lungs.  
3 **(B-C)** Frequency **(B)** and absolute number **(C)** of lung eosinophils in *PacI*<sup>+/+</sup> (*n* = 4) and *PacI*<sup>-/-</sup> mice (*n* =  
4 4) on day 3 after papain administration, as determined by flow cytometry.  
5 **(D)** Representative H&E-stained lung sections from *PacI*<sup>+/+</sup> and *PacI*<sup>-/-</sup> mice on day 3 after papain  
6 administration.  
7 **(E)** The histological score of lungs from *PacI*<sup>+/+</sup> (*n* = 6) and *PacI*<sup>-/-</sup> mice (*n* = 6) on day 3 after papain  
8 administration.  
9 Data are shown as the means ± SEM. Statistical significance was assessed using a two-tailed unpaired  
10 Student's t test.

Supplemental Figure 2

A

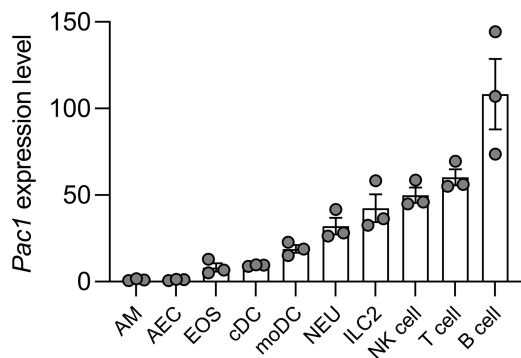

B

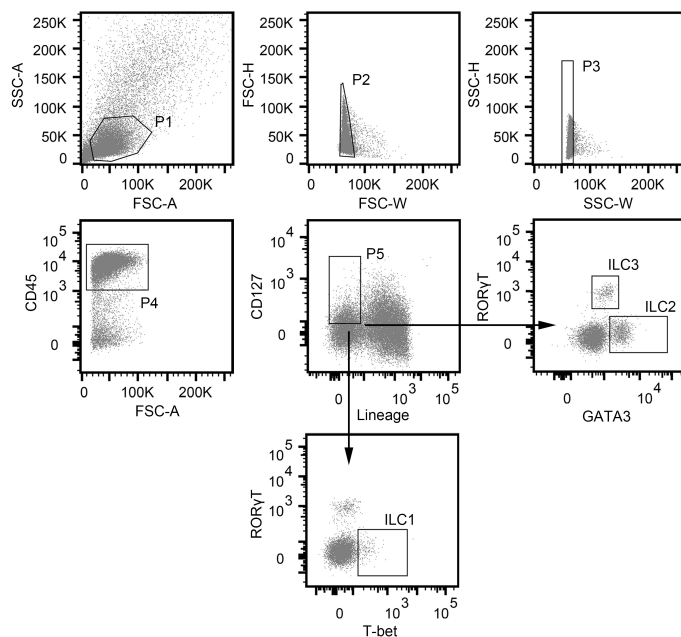

C

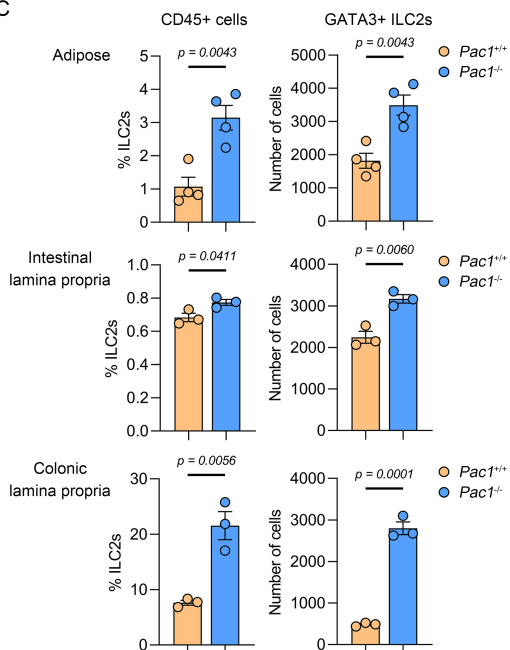

D

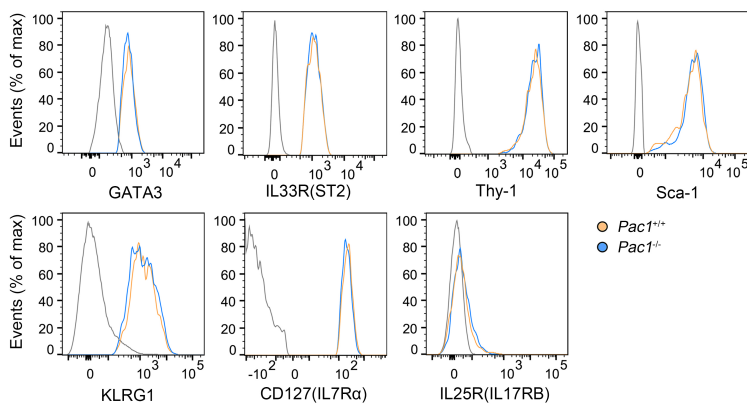

E

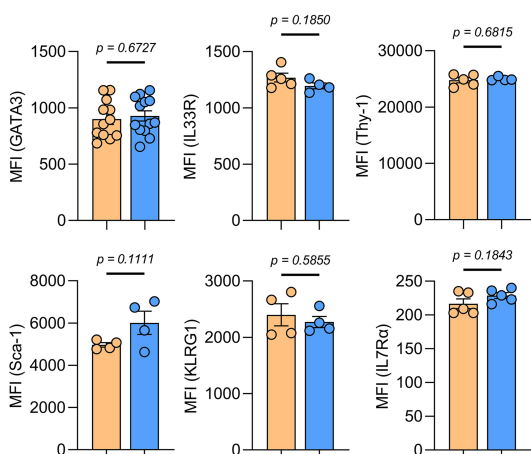

F

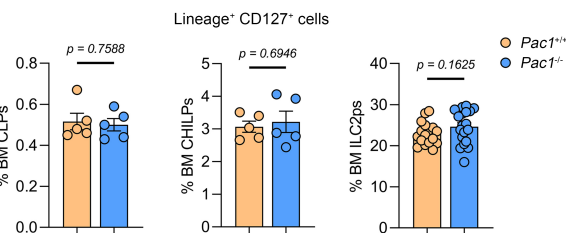

G

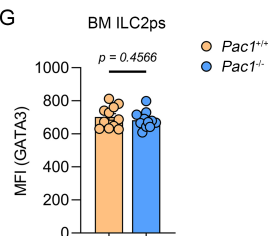

**Supplemental Figure 2. PAC1 is not involved in affecting the phenotype and heterogeneity of ILC2s, and does not affect the developmental processes of ILC2s**

**(A)** *Pac1* expression levels in various types of cells sorted from murine lungs, as determined by qPCR. Data are shown as the means  $\pm$  SEM. AM, alveolar macrophages; AEC, alveolar epithelial cells; EOS, eosinophils; cDC, conventional dendritic cells; moDC, monocyte-derived dendritic cells; NEU, neutrophils.

**(B)** Flow cytometry plots showing the gating strategies to identify T-bet<sup>+</sup> ILC1s, GATA3<sup>+</sup> ILC2s and ROR $\gamma$ T<sup>+</sup> ILC3s in murine lungs.

**(C)** Frequency and absolute number of GATA3<sup>+</sup> ILC2s in epididymal adipose tissue, intestinal lamina propria and colonic lamina propria of *Pac1*<sup>+/+</sup> ( $n = 3-4$ ) and *Pac1*<sup>-/-</sup> mice ( $n = 3-4$ ) in their resting states, as determined by flow cytometry.

**(D-E)** Expression histograms **(D)** of selected ILC2 markers in *Pac1*<sup>+/+</sup> and *Pac1*<sup>-/-</sup> lung GATA3<sup>+</sup> ILC2s in a resting states and mean fluorescence intensity (MFI) of each marker analyzed in **(E)**, as determined by flow cytometry.

**(F)** Frequency of CLPs (*Pac1*<sup>+/+</sup>,  $n = 5$ ; *Pac1*<sup>-/-</sup>,  $n = 5$ ), CHILPs (*Pac1*<sup>+/+</sup>,  $n = 5$ ; *Pac1*<sup>-/-</sup>,  $n = 5$ ), and ILC2ps (*Pac1*<sup>+/+</sup>,  $n = 17$ ; *Pac1*<sup>-/-</sup>,  $n = 19$ ) in bone marrow of *Pac1*<sup>+/+</sup> and *Pac1*<sup>-/-</sup> mice in their resting state, as determined by flow cytometry.

**(G)** MFI of GATA3 in bone marrow ILC2ps (*Pac1*<sup>+/+</sup>,  $n = 11$ ; *Pac1*<sup>-/-</sup>,  $n = 11$ ) of *Pac1*<sup>+/+</sup> and *Pac1*<sup>-/-</sup> mice in their resting state, as determined by flow cytometry.

Data are shown as the means  $\pm$  SEM. Statistical significance was assessed using a two-tailed unpaired Student's t test.

Supplemental Figure 3

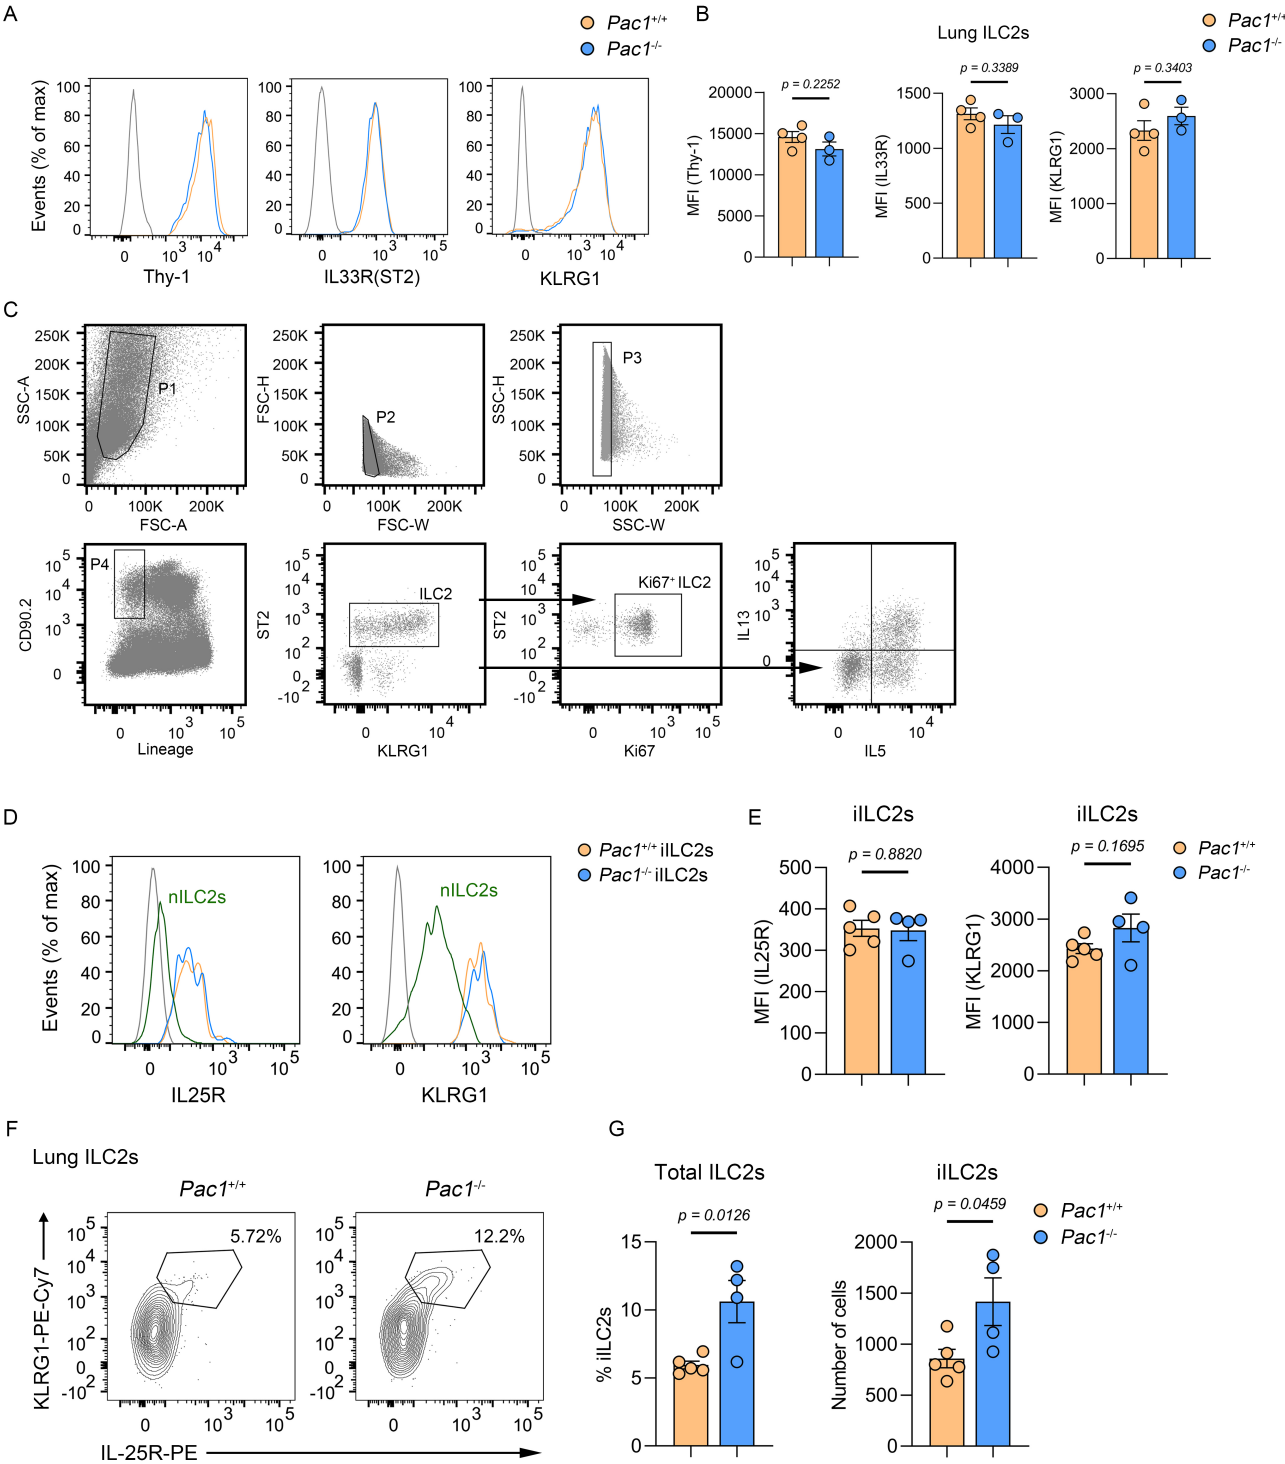

**Supplemental Figure 3. PAC1 also exhibits suppressive effects on inflammatory ILC2s**

**(A-B)** Expression histograms **(A)** of selected ILC2 markers in *Pac1*<sup>+/+</sup> (*n* = 4) and *Pac1*<sup>-/-</sup> (*n* = 3) lung GATA3<sup>+</sup> ILC2s on day 4 after IL-33 administration and mean fluorescence intensity (MFI) of each marker analyzed in **(B)**, as determined by flow cytometry.

**(C)** Flow cytometry plots showing the gating strategies to identify ILC2s, Ki67<sup>+</sup> ILC2s and IL-5<sup>+</sup> IL-13<sup>+</sup> ILC2s in murine lungs.

**(D-E)** Expression histograms **(D)** of IL-25R and KLRG1 in *Pac1*<sup>+/+</sup> (*n* = 5) and *Pac1*<sup>-/-</sup> (*n* = 4) lung inflammatory ILC2s (iILC2s) on day 4 after IL-25 administration and mean fluorescence intensity (MFI) of each marker analyzed in **(E)**, as determined by flow cytometry.

**(F-G)** Frequency **(F)** and absolute number **(G)** of lung iILC2s in *Pac1*<sup>+/+</sup> (*n* = 5) and *Pac1*<sup>-/-</sup> mice (*n* = 4) on day 4 after IL-25 administration, as determined by flow cytometry.

Data are shown as the means ± SEM. Statistical significance was assessed using a two-tailed unpaired Student's t test.

# Supplemental Figure 4

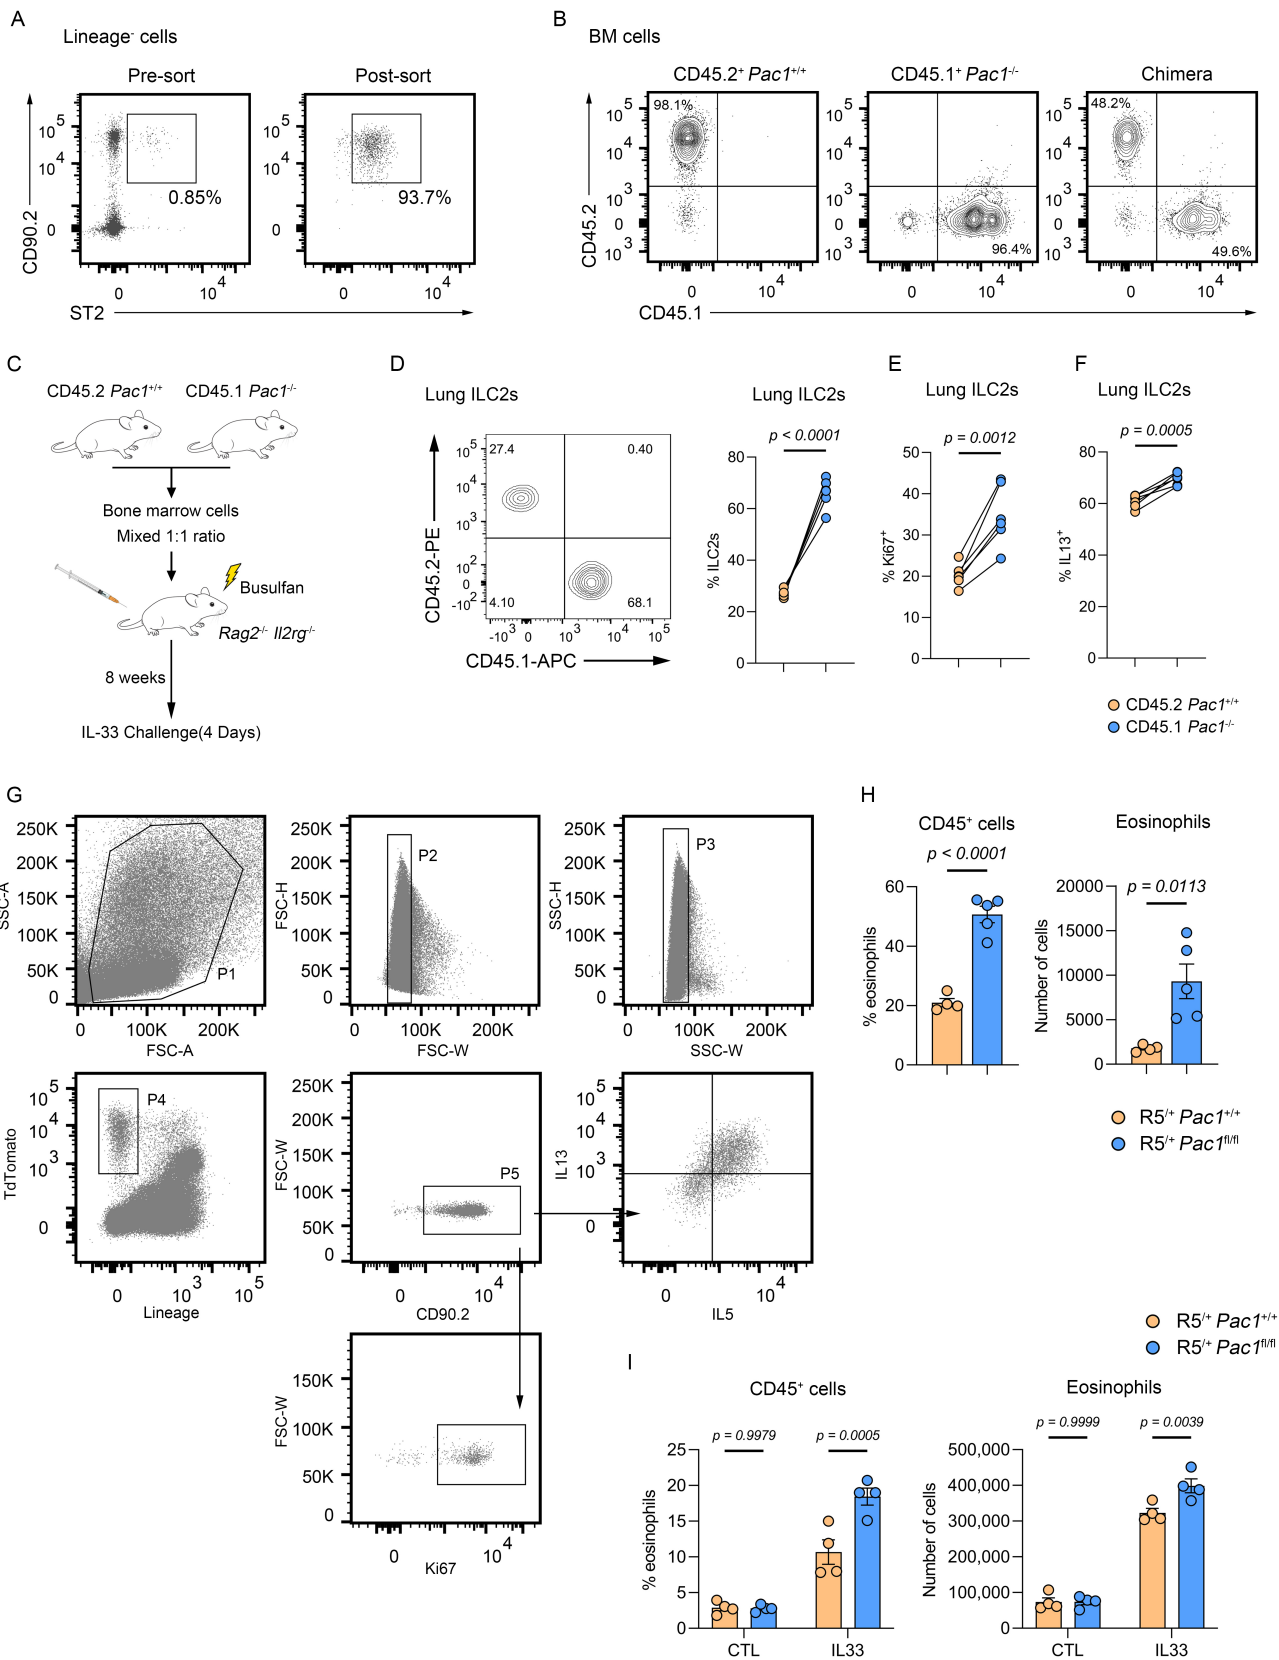

**Supplemental Figure 4. PAC1 plays a cell-intrinsic inhibitory role in ILC2s**

**(A)** Pre-sort and post-sort purity of ILC2s from murine lungs.

**(B)** Frequency of CD45.1<sup>+</sup> cells and CD45.2<sup>+</sup> cells in donor CD45.2<sup>+</sup> *Pac1*<sup>+/+</sup> mice, donor CD45.1<sup>+</sup> *Pac1*<sup>-/-</sup> mice and recipient *Rag2*<sup>-/-</sup> *Il2rg*<sup>-/-</sup> mice in the bone marrow chimera model.

**(C)** Experimental protocol followed for generating mixed bone marrow chimera.

**(D)** Frequency of lung CD45.2<sup>+</sup> *Pac1*<sup>+/+</sup> ILC2s and CD45.1<sup>+</sup> *Pac1*<sup>-/-</sup> ILC2s in chimeric mice (*n* = 6) on day 4 after IL-33 administration, as determined by flow cytometry.

**(E)** Frequency of lung CD45.2<sup>+</sup> *Pac1*<sup>+/+</sup> Ki67<sup>+</sup> ILC2s and CD45.1<sup>+</sup> *Pac1*<sup>-/-</sup> Ki67<sup>+</sup> ILC2s in chimeric mice (*n* = 6) on day 4 after IL-33 administration, as determined by flow cytometry.

**(F)** Frequency of lung CD45.2<sup>+</sup> *Pac1*<sup>+/+</sup> IL-13<sup>+</sup> ILC2s and CD45.1<sup>+</sup> *Pac1*<sup>-/-</sup> IL-13<sup>+</sup> ILC2s in chimeric mice (*n* = 6) on day 4 after IL-33 administration, as determined by flow cytometry.

**(G)** Flow cytometry plots showing the gating strategies to identify Ki67<sup>+</sup> ILC2s and IL-5<sup>+</sup> IL-13<sup>+</sup> ILC2s in the lungs of R5<sup>+/+</sup> mice.

**(H)** Frequency and absolute number of BALF eosinophils in R5<sup>+/+</sup> *Pac1*<sup>+/+</sup> (*n* = 4) and R5<sup>+/+</sup> *Pac1*<sup>fl/fl</sup> mice (*n* = 5) on day 4 after IL-33 administration, as determined by flow cytometry.

**(I)** Frequency and absolute number of lung eosinophils in R5<sup>+/+</sup> *Pac1*<sup>+/+</sup> and R5<sup>+/+</sup> *Pac1*<sup>fl/fl</sup> mice in resting state (R5<sup>+/+</sup> *Pac1*<sup>+/+</sup>, *n* = 4; R5<sup>+/+</sup> *Pac1*<sup>fl/fl</sup>, *n* = 4) or on day 4 after IL-33 administration (R5<sup>+/+</sup> *Pac1*<sup>+/+</sup>, *n* = 4; R5<sup>+/+</sup> *Pac1*<sup>fl/fl</sup>, *n* = 4), as determined by flow cytometry.

Data are shown as the means ± SEM. Statistical significance was assessed using a two-tailed paired

Student's t test (**D-F**), a two-way ANOVA followed by Holm-Sidak multiple-comparisons test (**I**) or a two-tailed unpaired Student's t test (**H**).

Supplemental Figure 5

A

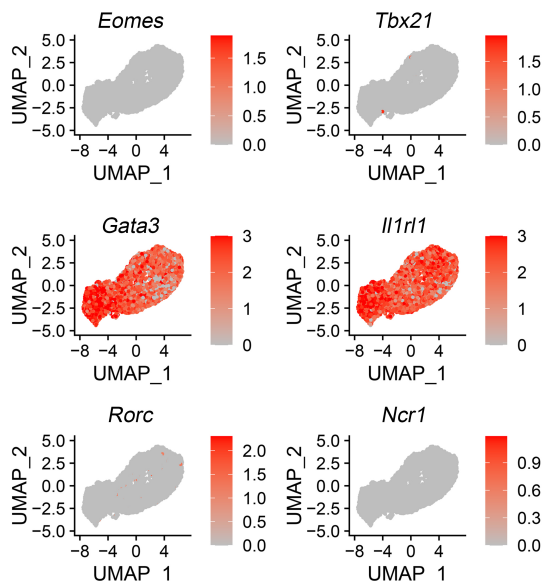

B

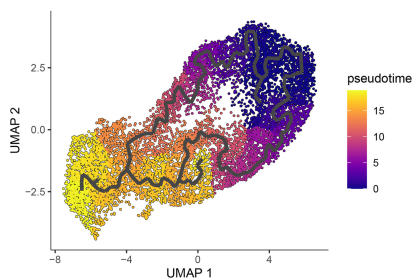

C

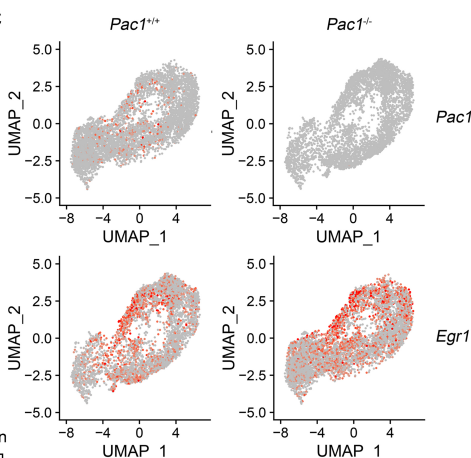

D

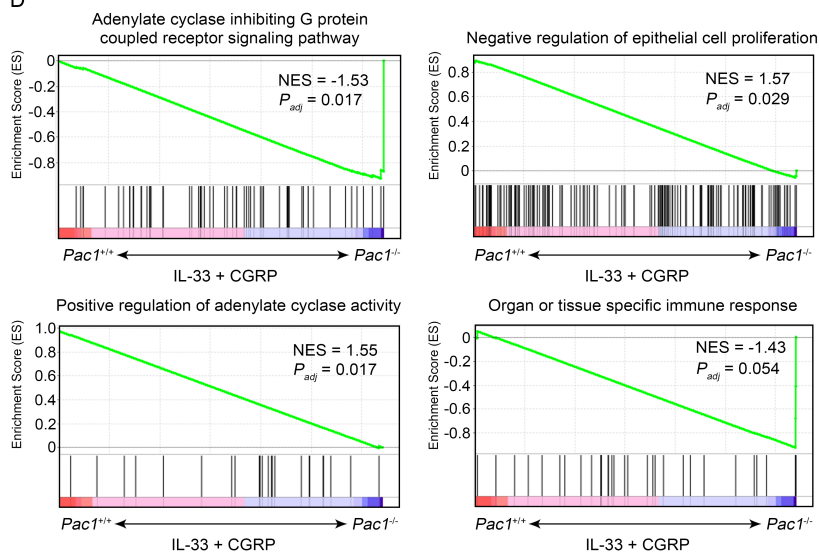

E

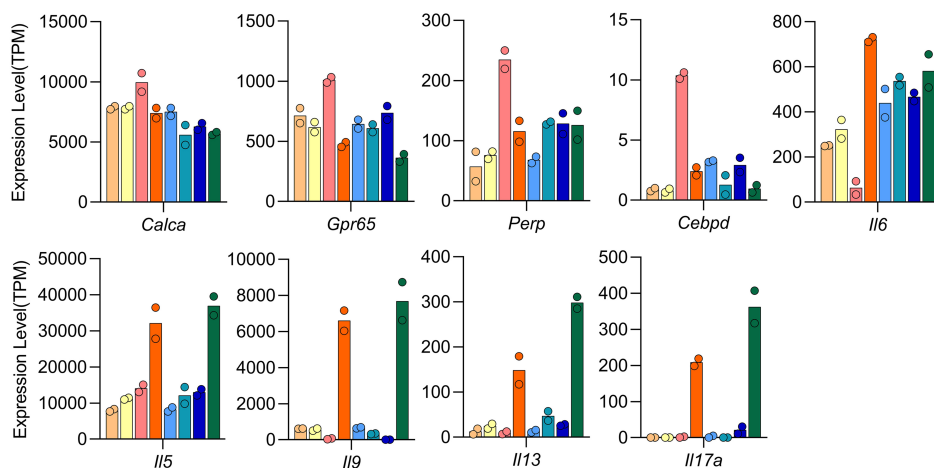

F

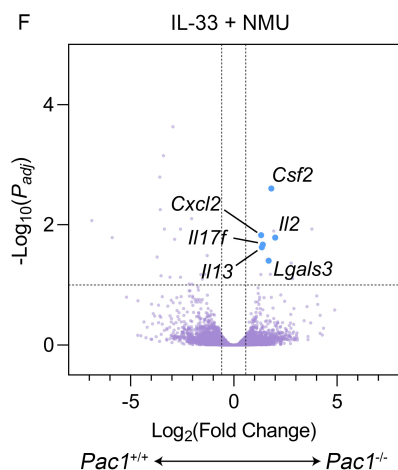

Legend for Panel E:

- Pac1*<sup>+/+</sup>
  - IL-7
  - IL-7 + IL-33
  - IL-7 + IL-33 + CGRP
  - IL-7 + IL-33 + NMU
- Pac1*<sup>-/-</sup>
  - IL-7
  - IL-7 + IL-33
  - IL-7 + IL-33 + CGRP
  - IL-7 + IL-33 + NMU

73 **Supplemental Figure 5. PAC1 deficiency impairs CGRP signaling in ILC2s**  
74 **(A)** Expression distribution of classic marker genes of ILC2s (*Gata3*, *Il1rl1*) or other ILC subtypes (*Eomes*,  
75 *Tbx21*, *Rorc*, *Ncr1*) in sorted murine lung ILC2s.  
76 **(B)** The regulation trajectory of murine lung ILC2s displayed according to a pseudotime analysis, using the  
77 R package Monocle 3.  
78 **(C)** Expression distribution of *Pac1* and *Egr1* in *Pac1*<sup>+/+</sup> and *Pac1*<sup>-/-</sup> lung ILC2s.  
79 **(D)** GSEA plots showing representative pathways enriched in *Pac1*<sup>+/+</sup> and *Pac1*<sup>-/-</sup> murine lung ILC2s after  
80 treatment with IL-33 plus CGRP. NES, normalized enrichment score.  
81 **(E)** Expression levels (transcripts per million, TPM) of representative genes in *Pac1*<sup>+/+</sup> and *Pac1*<sup>-/-</sup> murine  
82 lung ILC2s under four different conditions of stimulation. Two replicates were analyzed per condition.  
83 **(F)** Volcano plots of DEGs in *Pac1*<sup>+/+</sup> versus *Pac1*<sup>-/-</sup> murine lung ILC2s after treatment with IL-33 plus  
84 NMU (Fold Change > 1.5; *P*<sub>adj</sub> < 0.05). Representative DEGs are shown.

85

Supplemental Figure 6

A

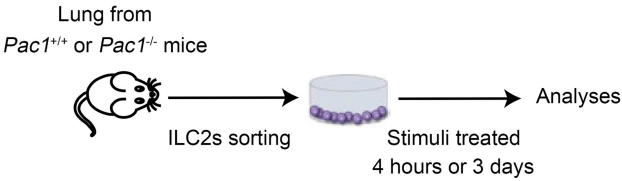

B

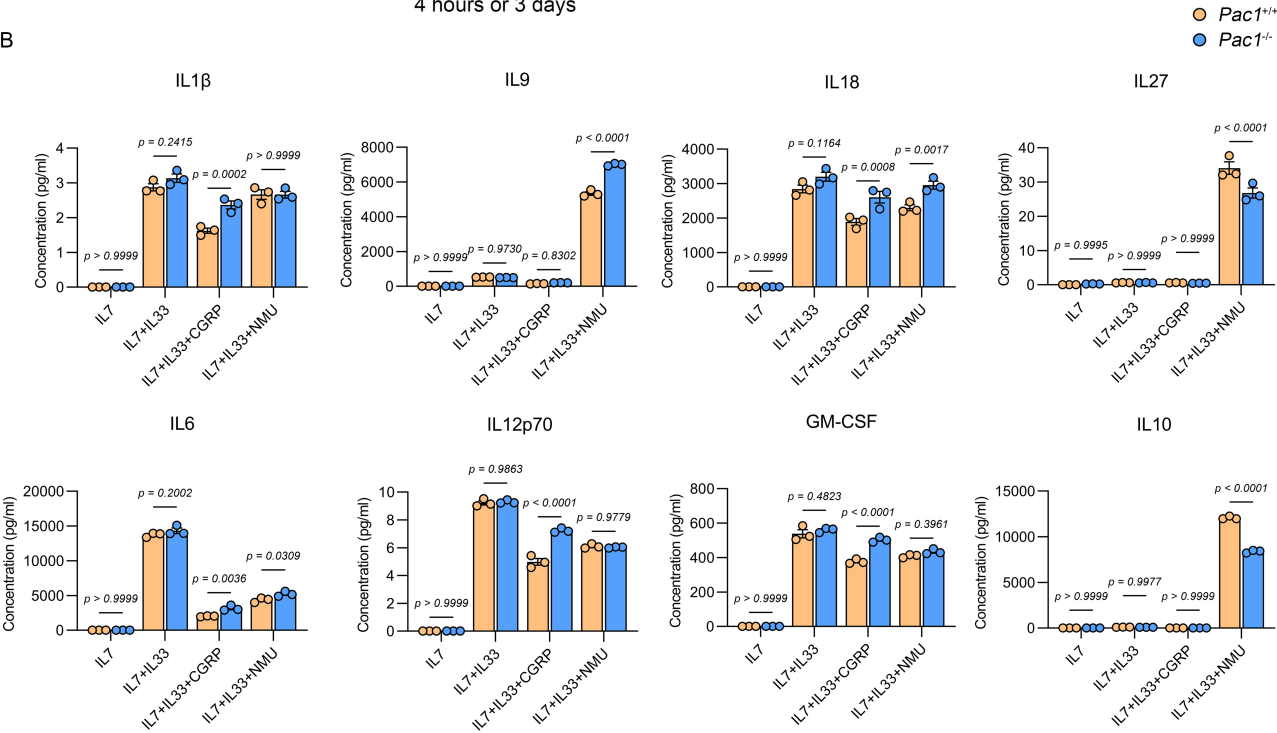

C

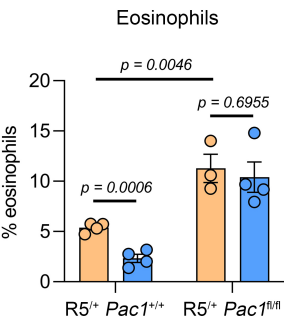

D

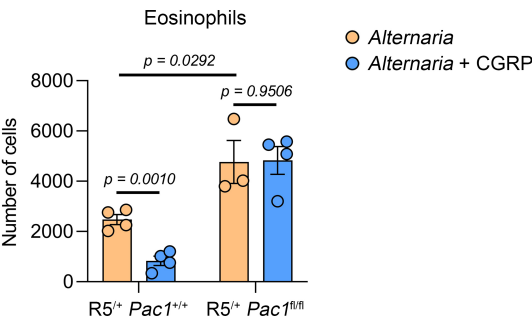

86 **Supplemental Figure 6. PAC1 promotes CGRP-mediated inhibition of ILC2 responses**  
87 **(A)** Strategy for *in vitro* ILC2 stimulation.  
88 **(B)** Purified *PacI*<sup>+/+</sup> and *PacI*<sup>-/-</sup> murine lung ILC2s were treated under different conditions of stimulation for  
89 3 days, and then the concentrations of a range of cytokines in the cell supernatants were assessed by  
90 Luminex liquid chip technology. Three replicates were analyzed per condition.  
91 **(C-D)** Frequency **(C)** and absolute number **(D)** of BALF eosinophils in R5<sup>+/+</sup> *PacI*<sup>+/+</sup> and R5<sup>+/+</sup> *PacI*<sup>fl/fl</sup> mice  
92 on day 4 after *Alternaria alternata* administration (R5<sup>+/+</sup> *PacI*<sup>+/+</sup>, *n* = 4; R5<sup>+/+</sup> *PacI*<sup>fl/fl</sup>, *n* = 4) or *Alternaria*  
93 *alternata* plus CGRP administration (R5<sup>+/+</sup> *PacI*<sup>+/+</sup>, *n* = 4; R5<sup>+/+</sup> *PacI*<sup>fl/fl</sup>, *n* = 4), as determined by flow  
94 cytometry.  
95  
96 Data are shown as the means ± SEM. Statistical significance was assessed using a two-way ANOVA  
97 followed by Holm-Sidak multiple-comparisons test **(B)** or a two-tailed unpaired Student's *t* test **(C-D)**.  
98

| Supplemental Table 1. The sequences of qPCR primers used in this study |                         |                          |
|------------------------------------------------------------------------|-------------------------|--------------------------|
|                                                                        | Forward primer (5'-3')  | Reverse primer (5'-3')   |
| mouse <i>Il5</i>                                                       | GACAAGCAATGAGACGATGAGG  | CCACTCTGTACTCATCACACC    |
| mouse <i>Il13</i>                                                      | TGGTATGGAGTGTGGACCTG    | AGCAAAGTCTGATGTGAGAAAGG  |
| mouse <i>Pac1</i>                                                      | TGCCGTGGTGCTGGATGAAA    | CCTCGGGTCAGAGTTGCTATTT   |
| mouse <i>Calca</i>                                                     | GCCTTTGAGGTCAATCTTGGA   | TGGGAACAAAGTTGTCCTTCAC   |
| mouse <i>Actb</i>                                                      | GAGACCTTCAACACCCCAGC    | ATGTCACGCACGATTTCCTC     |
| human <i>CALCA</i>                                                     | CTCCATGCAGCACCATTCAG    | GTGTGAAACTTGTTGAAGTCCTG  |
| human <i>PAC1</i>                                                      | CAAGAGTATCCCTGTGGAGGAC  | GAAACTGAAGTTGGGGGAGATG   |
| human <i>IL13</i>                                                      | GAATCCCTGATCAACGTGTC    | GAATCTGCAACTTCAATAGTCAGG |
| human <i>GPR65</i>                                                     | CGGAAGAAATATGGAAGGAAAGG | TTACACAGATATCAGCAGTTGG   |
| human <i>GAPDH</i>                                                     | ACCCACTCCTCCACCTTTGA    | ACCCACTCCTCCACCTTTGA     |
|                                                                        |                         |                          |
|                                                                        |                         |                          |
